# Supplementary material
Source: Springer Nature journal article supplement (https://www.springermedizin.de/resource/supplementary/12967_2011_790_MOESM4_ESM.pdf/9577064)

Binding to  $A\beta_{42}$  (OD<sub>450</sub>)

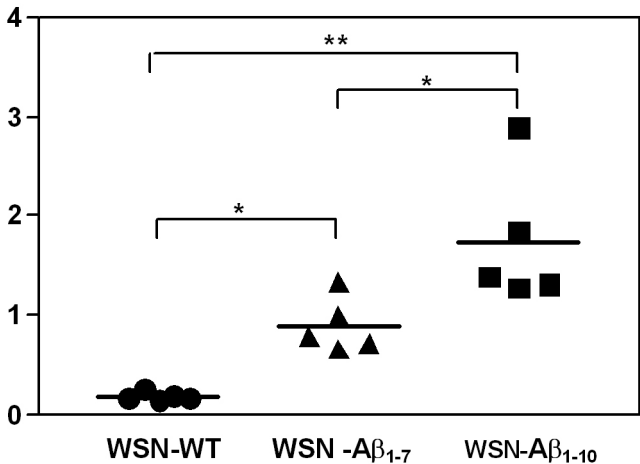

Supplement: MOESM4 [file 9577064]
